# Supplementary material
Source: MDPI journal article supplement (https://www.mdpi.com/2218-1997/8/12/611)
Supplement: s1 [file s1]

**Table S1. Considered cases, and characteristic background parameters.**

| №  | Date       | SW type | S/c in the<br>dayside<br>MSH | S/c at the<br>flank<br>MSH | Start<br>time,<br>UT | End<br>time,<br>UT | Time shifts, sec  |                     | $\theta_{Bn}, ^\circ$ |              | Dayside MSH<br>parameters |           |                             | SW parameters          |            |           |                        |           |                             |
|----|------------|---------|------------------------------|----------------------------|----------------------|--------------------|-------------------|---------------------|-----------------------|--------------|---------------------------|-----------|-----------------------------|------------------------|------------|-----------|------------------------|-----------|-----------------------------|
|    |            |         |                              |                            |                      |                    | WIND-<br>Spektr-R | Themis-<br>Spektr-R | Dayside<br>MSH        | Flank<br>MSH | $V/V_A$                   | $\beta_p$ | $\alpha$<br>(V,B), $^\circ$ | N,<br>cm <sup>-3</sup> | V,<br>km/s | B ,<br>nT | T <sub>p</sub> ,<br>eV | $\beta_p$ | $\alpha$<br>(V,B), $^\circ$ |
| 1  | 2014-02-08 | Ejecta  | Themis-A                     | Spektr-R                   | 00:32                | 01:06              | 3440              | 685                 | 75                    | 75           | 0.4                       | 0.7       | 75                          | 6.1                    | 459        | 11.7      | 8.4                    | 0.15      | 61                          |
| 2  | 2014-02-09 | SLOW    | Themis-D                     | Spektr-R                   | 04:31                | 04:48              | 3600              | 720                 | 56                    | 58           | 0.5                       | 2.6       | 150                         | 4.3                    | 431        | 7.0       | 2.9                    | 0.10      | 119                         |
| 3  | 2014-02-16 | MC      | Themis-E                     | Spektr-R                   | 05:06                | 05:40              | 3830              | 835                 | 80                    | 80           | 0.5                       | 0.7       | 64                          | 9.4                    | 405        | 17.0      | 3.0                    | 0.04      | 78                          |
| 4  | 2014-02-27 | SLOW    | Themis-D                     | Spektr-R                   | 15:25                | 15:59              | 3480              | 720                 | 75                    | 75           | 0.8                       | 4.3       | 55                          | 17.4                   | 353        | 4.7       | 3.2                    | 1.01      | 121                         |
| 5  | 2014-02-27 | CIR     | Themis-A                     | Spektr-R                   | 19:00                | 19:34              | 4580              | 480                 | 85                    | 60           | 0.7                       | 2.0       | 82                          | 21.2                   | 472        | 14.3      | 21.3                   | 0.89      | 88                          |
| 6  | 2014-07-09 | SLOW    | Spektr-R                     | Themis-C                   | 18:09                | 18:43              | 3410              | -1500               | 60                    | 80           | --                        | --        | --                          | 8.4                    | 351        | 6.2       | 4.6                    | 0.40      | 82                          |
| 7  | 2015-03-17 | SHEATH  | Themis-D                     | Spektr-R                   | 09:40                | 10:14              | 2680              | -480                | 60                    | 45           | 1.7                       | 3.5       | 151                         | 24.2                   | 545        | 21.4      | 67.1                   | 1.43      | 136                         |
| 8  | 2015-03-17 | MC      | Themis-E                     | Spektr-R                   | 20:53                | 21:10              | 2840              | 540                 | 60                    | 60           | 0.5                       | 1.5       | 84                          | 9.7                    | 563        | 18.4      | 5.6                    | 0.06      | 62                          |
| 9  | 2015-07-04 | CIR     | Themis-D                     | Spektr-R                   | 14:05                | 14:39              | 3770              | 162                 | 75                    | 75           | 1.2                       | 2.2       | 75                          | 30.5                   | 365        | 14.5      | 7.7                    | 0.45      | 87                          |
| 10 | 2016-05-21 | CIR     | Themis-D                     | Spektr-R                   | 06:00                | 06:34              | 2760              | 180                 | 80                    | 75           | 1.9                       | 6.2       | 109                         | 10.4                   | 493        | 8.9       | 8.6                    | 0.46      | 123                         |
| 11 | 2017-11-15 | CIR     | Themis-D                     | Spektr-R                   | 15:45                | 16:19              | 3230              | 415                 | 70                    | 70           | 1.0                       | 3.5       | 81                          | 27.9                   | 425        | 9.7       | 2.6                    | 0.32      | 102                         |
| 12 | 2017-12-04 | CIR     | Themis-A                     | Spektr-R                   | 15:50                | 16:24              | 4031              | 712                 | 75                    | 60           | 2.2                       | 3.8       | 97                          | 31.8                   | 326        | 4.9       | 2.5                    | 1.34      | 82                          |

**Comments on Table S1:**

- Time shift  $dT$  is defined as follows:  $T_i + dT = T_{SpR}$ , where  $T_i$  is the time of spacecraft  $i$ ,  $T_{SpR}$  is time of Spektr-R; negative values of the shift means that a disturbance is registered first at Spektr-R and than at spacecraft  $i$ .
- Dates, Start and End times are defined for Spektr-R spacecraft, for other spacecraft time shifts must be substituted.
